# Supplementary material for: Enhancing hydrological modeling with bias-corrected satellite weather data in data-scarce catchments: a comparative analysis of SWAT and GR4J models
Source: Frontiers journal article supplement (doi:10.3389/frwa.2025.1582589), 2025-06-18
Supplement: Table_1.pdf [file Table_1.pdf]

# **Enhancing Hydrological Modeling with Bias-Corrected Satellite Weather Data in Data-Scarce Catchments: A Comparative Analysis of SWAT and GR4J Models**

**Youness Hrouur<sup>1\*</sup>, Zahra Thomas<sup>1</sup>, Pauline Rousseau-Gueutin<sup>2</sup>, Yassine Ait Brahimi<sup>3</sup>, Ophélie Fovet<sup>1</sup>**

<sup>1</sup>Institut Agro, INRAE, SAS, F-35000 Rennes, France

<sup>2</sup>Univ Rennes, EHESP, Rennes, France

<sup>3</sup>International Water Research Institute (IWRI), Mohammed VI Polytechnic University (UM6P), Hay My Rachid, Ben Guerir 43150, Morocco

**\* Correspondence:**

Youness Hrouur

[Hrouur.iav@gmail.com](mailto:Hrouur.iav@gmail.com)

## Appendix 1: Soil data used in the SWAT model

The Harmonized World Soil Database (Fao et al., 2012), was used in this study. This database contains 16,000 mapped units with two different soil layers (0-30 cm and 30-100 cm depth) (Nachtergaele et al., 2010). Table A1 lists all soil properties required by SWAT, their sources, references and calculation methods.

Table S1 : SWAT model input parameters for each soil type.

| SWAT code | Description                                                                                                             | Source                                                    |
|-----------|-------------------------------------------------------------------------------------------------------------------------|-----------------------------------------------------------|
| SOL_ZMX   | Maximum rooting depth of soil profile (mm)                                                                              | HWSD                                                      |
| SOL_Z     | Depth from soil surface to bottom of layer (mm)                                                                         | HWSD                                                      |
| SOL_BD    | Moist bulk density (Mg/m <sup>3</sup> or g/cm <sup>3</sup> )                                                            | HWSD                                                      |
| SOL_AWC   | Available water capacity of the soil layer (mm H <sub>2</sub> O/mm soil)                                                | HWSD                                                      |
| SOL_K     | Saturated hydraulic conductivity (mm/hr)                                                                                | Jabro's equation (Jabro ,1992)                            |
| HYDGRP    | Soil hydrologic group (A, B, C, or D)                                                                                   | HWSD                                                      |
| SOL_CBN   | Organic carbon content (% soil weight)                                                                                  | HWSD                                                      |
| CLAY      | Clay content (% soil weight)                                                                                            | HWSD                                                      |
| SILT      | Silt content (% soil weight)                                                                                            | HWSD                                                      |
| SAND      | Sand content (% soil weight)                                                                                            | HWSD                                                      |
| ROCK      | Rock fragment content (% total weight)                                                                                  | HWSD                                                      |
| SOL_ALB   | Moist soil albedo                                                                                                       | --                                                        |
| USLE_K    | USLE equation soil erodibility (K) factor (units: 0.013 (metric ton m <sup>2</sup> hr)/(m <sup>3</sup> -metric ton cm)) | Williams' equation (Neitsch et al., 2011; Williams, 1995) |

- **Jabro's equation (Jabro ,1992) :**

$$SOL_K = 1000 \cdot \exp^{(11,86-0,81 \times \log(SILT)-1,09 \times \log(CLAY)-4,64 \times SOL_{BD})} \quad \text{Eq. A1.1}$$

- **Williams' equation (Williams, 1995) :**

$$USLE_K = f_{csand} \times f_{cl-si} \times f_{orgc} \times f_{hisand} \quad \text{Eq. A1.2}$$

With:

$$f_{csand} = 0,2 + 0,3 \times \exp^{-0,256 \times SAND \times \left(\frac{1-SILT}{100}\right)} \quad \text{Eq. A1.3}$$

And:

$$f_{cl-si} = \left(\frac{SILT}{SAND+SILT}\right)^{0,3} \quad \text{Eq. A1.4}$$

$$f_{orgc} = (1 - 0,25 \times Orgc + \exp^{3,72-2,95 \times orgc}) \quad \text{Eq. A1.5}$$

$$f_{hisand} = 1 - \frac{0,7 \times \frac{1-SAND}{100}}{\frac{1-SAND}{100}} + \exp^{-5,51 \times 22,9 \times \left(\frac{1-SAND}{100}\right)} \quad \text{Eq. A1.6}$$

Where Orgc is the percentage (%) of organic matter. For Sol\_K, SILT, SOL\_BD, USLE\_K, CLAY, and SAND see Table A1.

## Appendix 2: SWAT model parameters taken into account for the sensitivity analysis.

Table S2 : SWAT model parameters considered for the sensitivity analysis. The prefix 'v\_' denotes a replacement, while 'r\_' denotes a relative change (the existing parameter is multiplied by (1 + the specified value)).

| Variable name        | Definition                                                                                              | Unit                                   | Spatial level | Default value   | Initial intrval |
|----------------------|---------------------------------------------------------------------------------------------------------|----------------------------------------|---------------|-----------------|-----------------|
| v_SURLAG (.bsn)      | Surface runoff lag coefficient                                                                          | days                                   | Sub-basin     | 4               | [1 , 31]        |
| r_CN2 (.mgt)         | Condition II curve number                                                                               | -                                      | HRU           | Changes for HRU | [-0.75 , 0.75]* |
| r_OV_N (.hru)        | Manning's "n" value for overland flow                                                                   | -                                      | HRU           | Changes for HRU | [0.01 , 30]     |
| r_SOL_AWC (.sol)     | Available water capacity of the soil layer                                                              | mm H <sub>2</sub> O/mm sol             | HRU           | Changes for HRU | [-0.5 , 0.5]*   |
| r_SOL_K (.sol)       | Saturated hydraulic conductivity                                                                        | mm/hr                                  | HRU           | Changes for HRU | [-0.5 , 0.5]*   |
| r_SOL_BD (.sol)      | Moist bulk density                                                                                      | Mg/m <sup>3</sup> or g/cm <sup>3</sup> | HRU           | Changes for HRU | [-0.5 , 0.5]*   |
| v_ESCO (.hru ; .bsn) | Soil evaporation compensation factor                                                                    | -                                      | Sub-basin     | 0.95            | [0,1]           |
| v_EPCO (.hru ; .bsn) | Plant uptake compensation factor                                                                        | -                                      | Sub-basin     | 1               | [0,1]           |
| v_GW_delay (.gw)     | Groundwater delay                                                                                       | days                                   | HRU           | 31              | [0 , 450]       |
| Alpha_BF (.gw)       | Baseflow alpha factor                                                                                   | 1/days                                 | HRU           | 0.048           | [0 , 1]         |
| v_GW_Revap (.gw)     | Groundwater "revap" coefficient                                                                         | -                                      | HRU           | 0.02            | [0.02 , 0.2]    |
| v_GWQMN (.gw)        | Threshold depth of water in the shallow aquifer required for return flow to occur                       | mm H <sub>2</sub> O                    | HRU           | 1000            | [0 , 5000]      |
| v_RCHRG_DP (.gw)     | Deep aquifer percolation fraction                                                                       | -                                      | HRU           | 0.05            | [0 , 1]         |
| v_REVAPMN (.gw)      | Threshold depth of water in the shallow aquifer for "revap" or percolation to the deep aquifer to occur | mm H <sub>2</sub> O                    | HRU           | 0               | [0 , 500]       |
| v_Lat_Time (.hru)    | Lateral flow travel time                                                                                | days                                   | HRU           | 1               | [0 , 180]       |
| r_CH_N1 (.sub)       | Manning's "n" value for the tributary channels                                                          | -                                      | Sub-basin     | 0.014           | [0 , 0.3]       |
| r_CH_N2 (.rte)       | Manning's "n" value for the main channel                                                                | -                                      | Sub-basin     | 1.014           | [0 , 0.3]       |
| r_HRU_SLP (.hru)     | Average slope steepness                                                                                 | m/m                                    | HRU           | Changes for HRU | [-0.25 , 0.25]* |
| r_SLSUBBSN (.hru)    | Average slope length                                                                                    | m                                      | HRU           | Changes for HRU | [-0.2 , 0.2]*   |

### Appendix 3:

The performance of the models was assessed by calculating the efficiency criteria:

- **Nash-Sutcliffe efficiency coefficient (NSE)**: is a commonly used measure of the accuracy of hydrological models (Nash and Sutcliffe, 1970). The NSE ranges from  $-\infty$  (no better than the mean of the observations) to 1 (perfect prediction).

$$NSE = 1 - \frac{\sum_{i=1}^n (Q_{sim}^i - Q_{obs}^i)^2}{\sum_{i=1}^n (Q_{obs}^i - \overline{Q_{obs}})^2} \quad Eq. A3.1$$

- **Coefficient of determination ( $R^2$ )**: expresses the degree of linear correlation between measured and simulated discharge values. An  $R^2$  of 1 indicates that the model predicts discharge perfectly, while an  $R^2$  of 0 indicates that the model predicts discharge very poorly.

$$R^2 = \frac{[\sum_{i=1}^n (Q_{obs}^i - \overline{Q_{obs}})(Q_{sim}^i - \overline{Q_{sim}})]^2}{\sum_{i=1}^n (Q_{obs}^i - \overline{Q_{obs}})^2 \sum_{i=1}^n (Q_{sim}^i - \overline{Q_{sim}})^2} \quad Eq. A3.2$$

- **Root mean square error (RMSE)**: is the standard deviation of the residuals, which are the discrepancies between the observations and the model simulations. A lower RMSE indicates closer agreement between observations and model simulations.

$$RMSE = \sqrt{\frac{\sum_{i=1}^n (Q_{sim}^i - Q_{obs}^i)^2}{n}} \quad Eq. A3.3$$

- **Percentage bias (Pbias)**: quantifies the average tendency of simulated discharge rates to deviate from their measured equivalents. A PBIAS value close to 0 indicates that the model is able to accurately reproduce the observed discharge, while a value significantly different from 0 indicates that the model has a systematic bias in its simulations. In general, a PBIAS value of less than 25% is considered satisfactory (Moriassi et al., 2007). Where  $Q_{obs}$ ,  $Q_{sim}$  and  $\overline{Q_{obs}}$ , and  $\overline{Q_{sim}}$  are the observed discharge, simulated discharge, the mean of the observed and simulated discharge at time step i, respectively, and n is the number of observations.
